# Supplementary material
Source: Royal Society of Chemistry journal article supplement (doi:10.1039/d6ee01319h)
Supplement: d6ee01319h1.pdf [file d6ee01319h1.pdf]

## Supporting Information

### **A synergistic dual additive strategy for constructing gradient hydrophobic interfaces toward ultrastable aqueous zinc metal anodes**

*Zongpu Xia,<sup>at</sup> Jingyi Ding,<sup>adt</sup> Sicheng Yang,<sup>a</sup> Qiaoli Zhang,<sup>b</sup> Yiwei Yuan,<sup>b</sup> Chengyuan Peng,<sup>a</sup> Junrong Luo,<sup>a</sup> Junhao Du,<sup>a</sup> Fei Ye,<sup>a</sup> Yanzhi Ai,<sup>a</sup> Yue Wang,<sup>e</sup> Xinxiang Zhang,<sup>a</sup> Wen Liu<sup>\*bc</sup> and Jitao Chen<sup>\*a</sup>*

<sup>a</sup> College of Chemistry and Molecular Engineering, Peking University, Beijing 100871, China

<sup>b</sup> College of Chemistry, Beijing University of Chemical Technology, Beijing 100029, China

<sup>c</sup> State Key Laboratory of Chemical Resource Engineering, Beijing University of Chemical Technology, Beijing 100029, China

<sup>d</sup> Suzhou Laboratory, Suzhou 215123, China

<sup>e</sup> Institute of NBC Defense, PLA Army, Beijing 102205, China

<sup>†</sup> These authors contributed equally to this work.

\*Corresponding Author: chenjitao@pku.edu.cn, wenliu@mail.buct.edu.cn

## Experimental Section

### Materials:

Zn-foil (10  $\mu\text{m}$  and 30  $\mu\text{m}$ ), Cu-foil (50  $\mu\text{m}$ ) were purchased from Sinopharm Chemical Reagent Co., Ltd.  $\text{ZnSO}_4 \cdot 7\text{H}_2\text{O}$  (>99.0%),  $\text{KMnO}_4$  (>99.0%),  $\text{MgSO}_4$  (>99.5%),  $\text{MnSO}_4 \cdot \text{H}_2\text{O}$  (>99.0%), benzyl acetone (BZA), ethanol (EtOH), N-methyl-2-pyrrolidone (NMP) were purchased from Aladdin Co., Ltd. polyvinylidene fluoride (PVDF) and acetylene black (AB) were purchased from Suzhou DodoChem Technology Co., Ltd.

The polished Zn electrode was obtained by removing the passivation layer using an abrasive paper. All other reagents were analytical grade (AR) and used directly without further purification. Deionized water (DI) was used to prepare all aqueous electrolytes.

### Preparation of Electrolyte:

Aqueous electrolyte was prepared using  $\text{ZnSO}_4 \cdot 7\text{H}_2\text{O}$ ,  $\text{MgSO}_4$ , BZA, EtOH and DI based on molar ratio. Specifically,  $\text{ZnSO}_4 \cdot 7\text{H}_2\text{O}$  (28.76 g, 0.1 mol) was added to 50 mL of DI, followed by 0, 0, 0.25, 0.25 mmol (0, 0, 36.54 mg, 36.54 mg, respectively) of BZA, 0, 1.000 mL, 0, 1.000 mL EtOH, and the mixture was stirred for 0.5 h. Then the solution was sonicated for 15 minutes to give a clarified, colorless and transparent electrolyte, which was noted as ZS, ZE, ZB, ZEB. The preparation procedure for the  $\text{MgSO}_4$  electrolyte used in LSV testing is as follows:  $\text{MgSO}_4$  (12.04 g, 0.1 mol) was added to 50 mL of DI, followed by identical steps to those described above.

### Preparation of $\delta\text{-MnO}_2$ Cathode:

6.0 mM  $\text{KMnO}_4$  and 1.0 mM  $\text{MnSO}_4 \cdot \text{H}_2\text{O}$  were dispersed in 30.0 mL DI at 25 °C. The mixture was then transferred to a Teflon-lined autoclave and heated at 160 °C for 12 h. The obtained product was collected by filtration, washed with DI and ethanol, and ultimately dried at 80 °C.

The cathode was fabricated by mixing the  $\delta\text{-MnO}_2$  powder, AB, and PVDF with a weight ratio of 70:15:15 using NMP as solvent. The mixture slurry was printed on hydrophilic carbon circular discs and then transferred to a vacuum oven drying at 60 °C for 24 h. The loading mass of cut disc of electrodes is all within the scope of 1.2~1.8 mg along with a diameter of 0.8 cm.

### Characterization:

The Nuclear Magnetic Resonance (NMR, Bruker-400), Fourier Transform Infrared (FTIR, Thermo Nicolet iS50), and Sum Frequency Generation Vibrational Spectroscopy (SFG, EKSPILA SFG-073) were employed to analyze the element and surface chemistry of the samples. Zn foils were characterized with X-ray Diffraction (XRD, PANalytical X-Pert3 Powder,  $\text{Cu-K}\alpha$  radiation), Scanning Electron Microscopy (SEM, Hitachi S-4800), X-ray Photoelectron Spectroscopy (XPS, Kratos Analytical Ltd. AXIS Supra), and (EBSD, Bruker QUANTAX eFlashFS). It is necessary to clarify that the surface of the EBSD sample was treated with argon ion polishing. The ion beam

energy was set at 6 kV, the ion gun angle at 3°, and the processing time was 20 minutes. The in-situ optical microscope images, videos, and contact angles were obtained on an electron microscope (WYT-GTY, Viyee Photoelectric Devices (Tianjin) Co., Ltd., China) by using a homemade in-situ optical electrochemical cell.

### Electrochemical Measurements:

Electrochemical performance was tested using CR2032-type coin cells. Whatman GF/D glass microfiber was employed as the separator. The electrolyte volume in each coin cell was 0.1 mL. Cyclic voltammetry (CV) measurements were conducted with an electrochemical workstation (Autolab, China) between 1.0 and 1.8 V for Zn|| $\delta$ -MnO<sub>2</sub> full cells and between -1.015 and -0.995 V for Zn||Zn symmetric cells. Linear scanning voltammetry (LSV), Nyquist curves, chronoamperometry (CA) curves, and electrochemical impedance spectroscopy (EIS) were also performed on the Autolab. The cycling stability of the Zn anode was tested using Zn||Zn symmetric cells. Depth of discharge (DOD) testing used ultra-thin zinc foil (10  $\mu$ m), while other coin cells used thick zinc foil (30  $\mu$ m). Coulombic efficiency (CE) was determined using Zn||Cu asymmetric cells. Zn|| $\delta$ -MnO<sub>2</sub> full cells were assembled to evaluate the practical application value of the cells at current densities of 30.8 mA g<sup>-1</sup>, 92.4 mA g<sup>-1</sup>, 154 mA g<sup>-1</sup>, 308 mA g<sup>-1</sup>, 924 mA g<sup>-1</sup>, and 1.54 A g<sup>-1</sup>. The Blue Power Test System (Land-2001A, China) was used to perform charge/discharge tests. Each pouch-type Zn|| $\delta$ -MnO<sub>2</sub> full cell consisted of one 4.2×4.2 cm<sup>2</sup>, 10  $\mu$ m Zn foil as the anode, one 4.4×4.4 cm<sup>2</sup> GF/D glass fiber as the separator, and one 4.0×4.0 cm<sup>2</sup> carbon paper loaded with 7–9 mg cm<sup>-2</sup> of  $\delta$ -MnO<sub>2</sub> as the cathode.

### Desolvation energy barrier ( $E_a$ ):

The de-solvation process of Zn<sup>2+</sup> is considered to be the rate-limiting process for the deposition of zinc at the anode. It is usually analyzed using the activation energy ( $E_a$ ) obtained from the Arrhenius equation law.

$$\frac{1}{R_{ct}} = A \exp\left(-\frac{E_a}{RT}\right)$$

where  $R_{ct}$  is the charge-transfer resistance, A is the frequency factor, R is the gas constant, and T is the absolute temperature.

### Zn-ion transference number:

The Zn<sup>2+</sup> transference number ( $t_{Zn^{2+}}$ ) was measured by Bruce-Vincent method.

$$t_{Zn^{2+}} = \frac{I_{ss}(\Delta V - I_0 R_0)}{I_0(\Delta V - I_{ss} R_{ss})}$$

where  $\Delta V$  is the applied constant polarization voltage (20 mV),  $I_0$  and  $I_{ss}$  are the initial and steady current, and  $R_0$  and  $R_{ss}$  are the initial and steady resistance.

### Cyclic voltammetry (CV) b value:

By obtaining the CV curves of the full cell at different scan rates, the relationship curves between the peak current values of each peak and the scan rate are obtained. The b value is calculated through the following formula:

$$I = av^b$$

where I is the peak current, v is the scan rate, a and b are the fitting parameters. The testing was conducted at room temperature.

### Cumulative Plated Volumetric Capacity (CPVC):

CPVC eliminates the influence of zinc foil thickness compared to Cumulative Plated Capacity (CPC, unit: Ah cm<sup>-2</sup>).

The calculation method is as follows:

$$CPVC = \frac{CPC}{d_{Zn}} = \frac{CD \times t}{d_{Zn}} \quad (1)$$

where d<sub>Zn</sub> is the zinc foil thickness, CD is the current density, and t is the test duration. t can be correlated with CD, areal capacity (AC), and the number of cycles (N):

$$CD \times t = 2N \times AC \quad (2)$$

When a battery does not fail during a test (e.g., due to dendrite penetration or electrolyte depletion), its maximum number of cycles (N<sub>max</sub>) can be predicted based on the depth of discharge (DOD) and average Coulombic efficiency (ACE):

$$N_{max} = \frac{DOD^{-1} - 1}{1 - ACE} \quad (3)$$

The areal capacity (AC) is related to the depth of discharge (DOD) and the zinc foil thickness (d<sub>Zn</sub>) by the following expression:

$$AC = DOD \times d_{Zn} \times \frac{n_{Zn} \times \rho_{Zn} \times F}{3600 \times M_{Zn}} \quad (4)$$

where n<sub>Zn</sub> is the number of electrons transferred per Zn atom, ρ<sub>Zn</sub> is the density of Zn, F is Faraday's constant (96485 C mol<sup>-1</sup>), 3600 is the unit conversion constant between ampere-hour (Ah) and coulomb (C), and M<sub>Zn</sub> is the molar mass of Zn. By combining Equations (1), (2), (3), and (4), Equation (5) can be derived, which represents the theoretical maximum CPVC (CPVC<sub>max</sub>) of the battery system:

$$CPVC_{max} = \frac{n_{Zn} \times \rho_{Zn} \times F}{1800 \times M_{Zn}} \times \frac{1 - DOD}{1 - ACE} \quad (5)$$

### DFT calculations:

All periodic density functional theory (DFT) calculations were performed using the Quickstep module of CP2K (version 2025.1)<sup>[1,2]</sup>. The exchange–correlation energy was described by the Perdew–Burke–Ernzerhof (PBE) functional within the generalized gradient approximation (GGA)<sup>[3]</sup>, and core electrons were represented by the Goedecker–Teter–Hutter (GTH) pseudopotentials<sup>[4]</sup>. Dispersion corrections were included using Grimme’s D3BJ method<sup>[5,6]</sup>. For geometry optimizations, the DZVP-MOLOPT-SR-GTH basis set was employed for all atoms, while single-point energy calculations utilized the TZV2P-MOLOPT-GTH basis set<sup>[7]</sup>. A plane-wave cutoff energy of 650 Ry was applied in all computations.

The adsorption energy ( $E_{\text{ads}}$ ) between the zinc slab and the molecule was calculated according to the following equation:

$$E_{\text{ads}} = E_{\text{total}} - E_{\text{mole}} - E_{\text{slab}}$$

where  $E_{\text{total}}$ ,  $E_{\text{mole}}$ , and  $E_{\text{slab}}$  stand for the total energy of the optimized composite system, the energy of the isolated adsorbed molecule, and the energy of the clean zinc slab, respectively.

In this study, the adsorption behaviors of water and organic molecules on the Zn(002), Zn(100), and Zn(101) slabs were compared. Each surface model was constructed as a four-layer zinc slab, with the bottom two layers fixed during structural relaxation. Supercells of  $7 \times 7$ ,  $6 \times 5$ , and  $4 \times 6$  were built for the Zn(002), Zn(100), and Zn(101) slabs, respectively. Brillouin zone sampling was performed using Monkhorst–Pack grids of  $4 \times 4 \times 1$ ,  $4 \times 2 \times 1$ , and  $2 \times 4 \times 1$  for the corresponding surfaces<sup>[8]</sup>.

Prior to analyzing molecular surface electrostatic potentials, geometry optimizations were carried out with Gaussian 16<sup>[9]</sup> at the B3LYP/6-311G(d,p) level<sup>[10]</sup>, incorporating Grimme’s D3BJ dispersion correction. Visualization was conducted using VMD (Visual Molecular Dynamics) software<sup>[11]</sup>.

The generation of CP2K input files and the analysis of molecular surface electrostatic potentials were performed with the Multiwfn 3.8(dev) code<sup>[12–14]</sup>.

### Molecular dynamics simulation:

Molecular dynamics (MD) simulations were conducted with GROMACS software<sup>[15]</sup>. A time step of 1 fs was employed, with a cutoff distance of 1.0 nm for both the van der Waals interactions and electrostatic interactions. The electrostatic interactions were calculated by the particle mesh Ewald method (PME). The nonbonded interaction contains van der Waals (vdW) and electrostatic interactions, which are described by the Equation as follows.

$$E_{\text{LJ}}(r_{ij}) = 4\epsilon_{ij} \left[ \left( \frac{\epsilon_{ij}}{r_{ij}} \right)^{12} - \left( \frac{\epsilon_{ij}}{r_{ij}} \right)^6 \right]$$

$$E_{\text{c}}(r_{ij}) = \frac{q_i q_j}{4\pi\epsilon_0\epsilon_r r_{ij}}$$

The size of the cubic box is  $6.4 \times 5.6 \times 7 \text{ nm}^3$  (with periodic boundary conditions). The pure system contains one Zn electrode, 280  $\text{Zn}^{2+}$ , 280  $\text{SO}_4^{2-}$ , and 7000  $\text{H}_2\text{O}$ . The system 2 contains one Zn electrode, 280  $\text{Zn}^{2+}$ , 280  $\text{SO}_4^{2-}$ , 300 EtOH, 100 BZA, and 7000  $\text{H}_2\text{O}$ . The water model was OPC3, and the interaction parameters of various ions and molecules were taken from the GAFF force field. In the NVT simulations, the V-rescale thermostat with a

characteristic time of 2 ns was applied to implement the constant temperature condition. For the production simulations, the simulations were carried out for 30 ns to ensure the system reached equilibrium, and the last 5 ns of the equilibrium state were used for subsequent post-processing analysis.

## Supplementary Figures

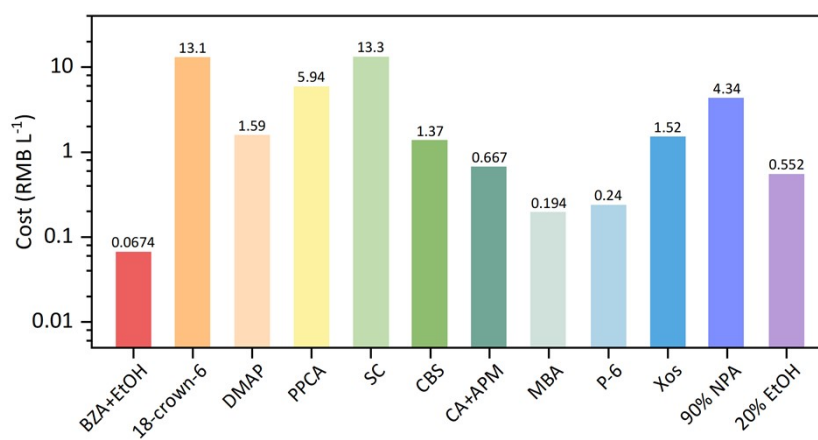

**Fig. S1.** Unit cost of multifunctional electrolyte formulations.

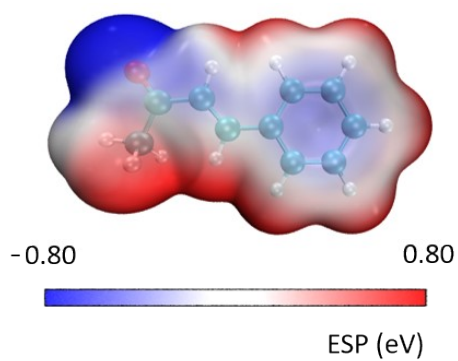

**Fig. S2.** The electrostatic potential (ESP) of BZA.

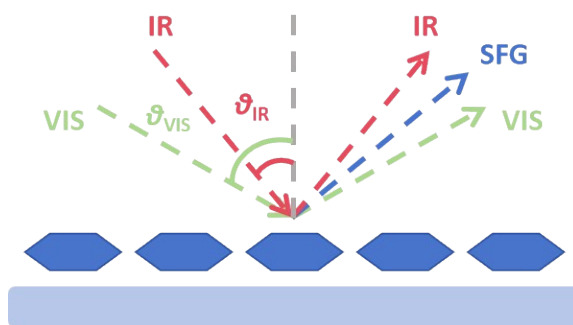

**Fig. S3** Schematic diagram of the vibrational sum-frequency generation (VSFG) spectroscopic setup. ( $\lambda_{\text{VIS}} = 532 \text{ nm}$ ,  $\vartheta_{\text{VIS}} = 60^\circ$ ,  $\vartheta_{\text{IR}} = 55^\circ$ ,  $E_{\text{VIS}} = 200 \mu\text{J}$ ,  $E_{\text{IR}} = 150 \mu\text{J}$ ).

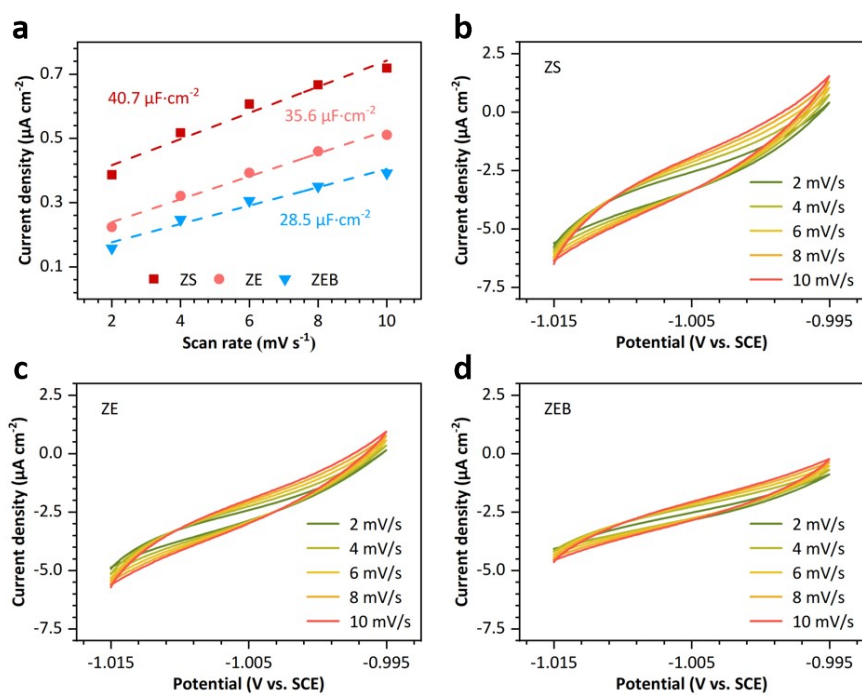

**Fig. S4** (a) Fitted double-layer capacitance results; CV curves for (b) ZS, (c) ZE, (d) ZEB.

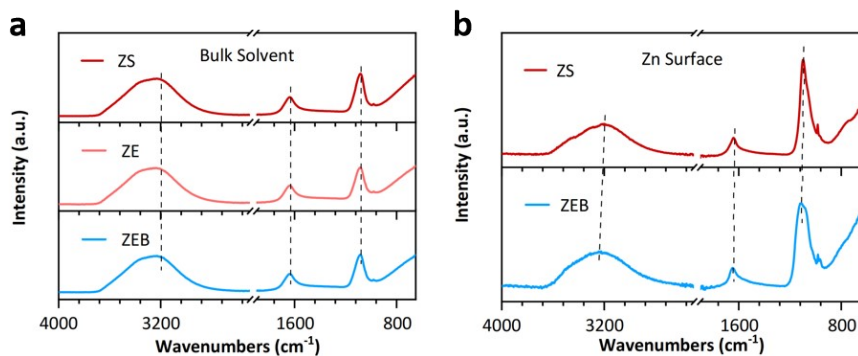

**Fig. S5** ATR-FTIR spectra of (a) bulk solution; (b) solution near the Zn surface

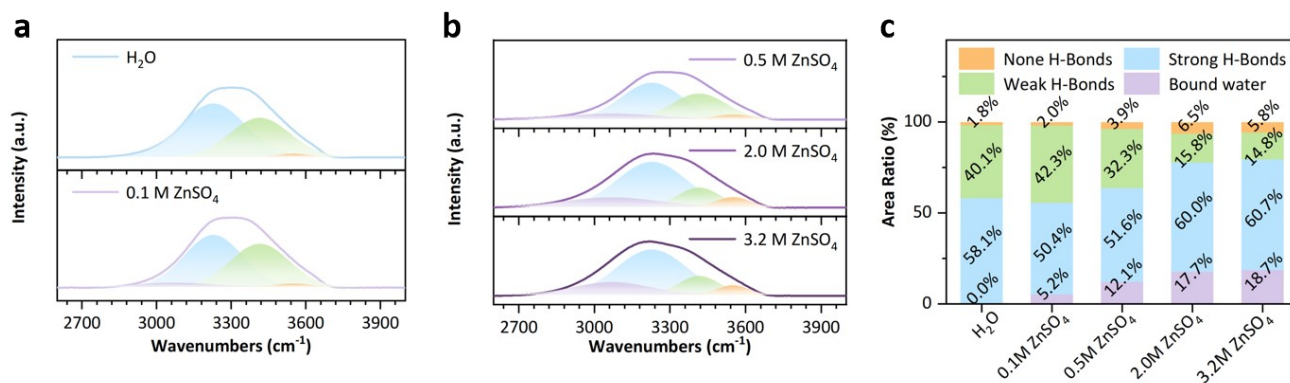

**Fig. S6** (a), (b) ATR-FTIR spectra of H<sub>2</sub>O and ZnSO<sub>4</sub> solutions of different concentrations; (c) Hydrogen bond composition ratios.

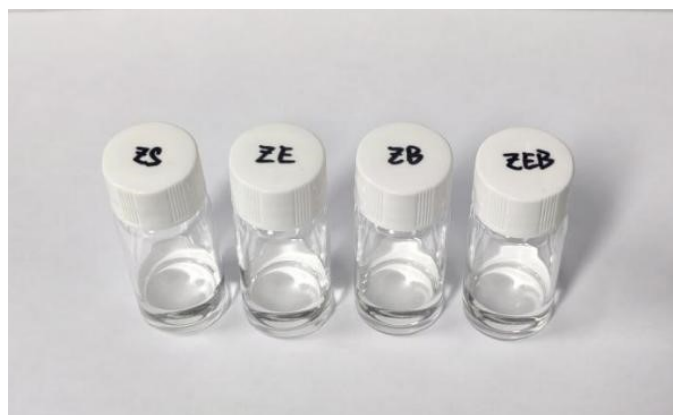

**Fig. S7** Schematic diagram of homogeneous electrolytes (ZS is 2 M ZnSO<sub>4</sub>; ZE is ZS + 2% EtOH; ZB is ZS + 5 mM BZA; ZEB is ZE + 5 mM BZA).

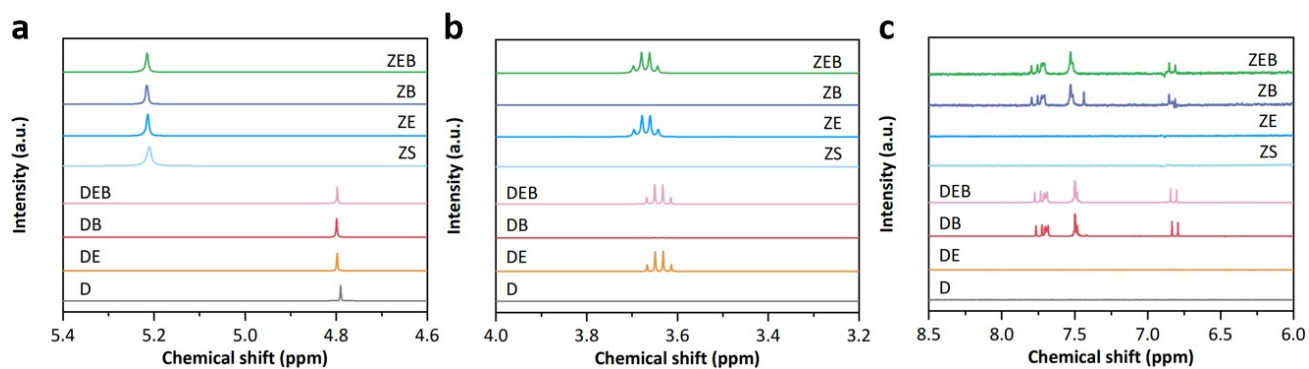

**Fig. S8** <sup>1</sup>H NMR spectra of different electrolytes: (a) Water peak; (b) Ethanol -CH<sub>2</sub>- peak; (c) BZA peaks (D = D<sub>2</sub>O; DE = D<sub>2</sub>O+EtOD; DB = D<sub>2</sub>O+BZA; DEB = D<sub>2</sub>O+EtOD+BZA; ZB = ZS+BZA).

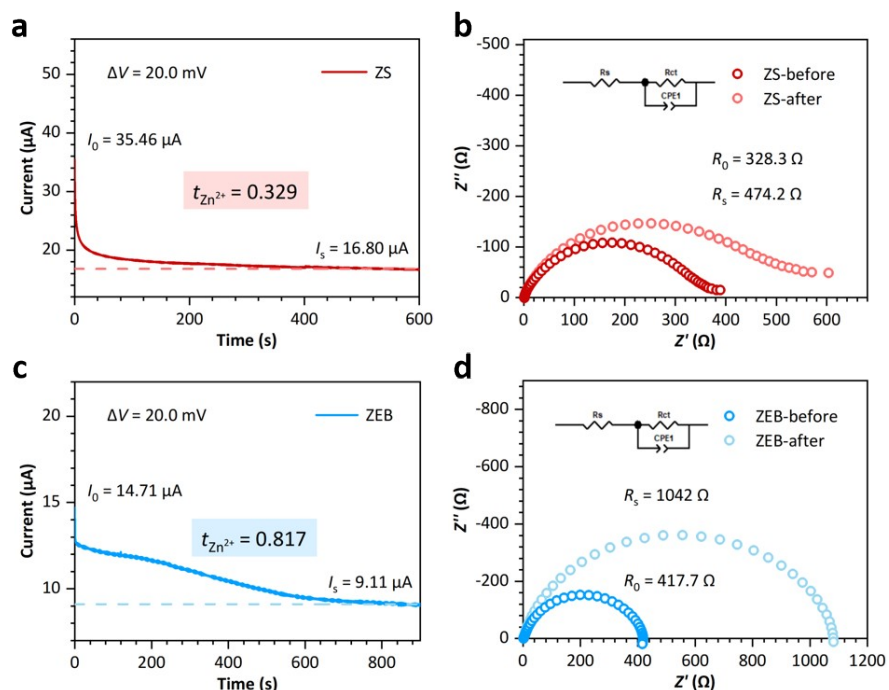

**Fig. S9**  $\text{Zn}^{2+}$  transference number tests: (a),(c) Chronoamperometry (CA) tests; (b),(d) EIS spectra and fitted resistance results before and after activation.

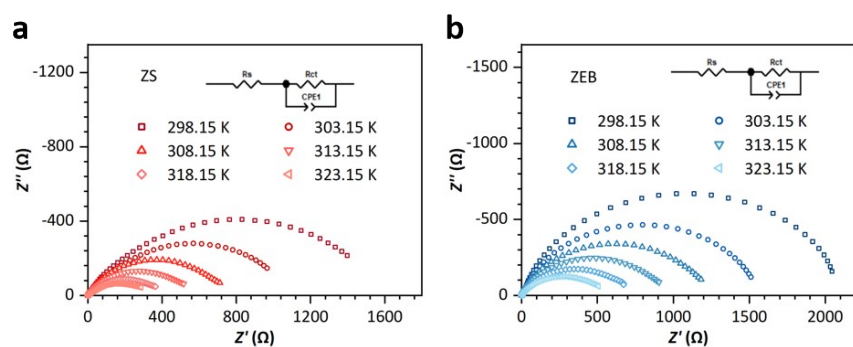

**Fig. S10** Raw data for  $\text{Zn}^{2+}$  desolvation energy: EIS spectra of  $\text{Zn}||\text{Zn}$  symmetric cells at different temperatures using (a) ZS electrolyte; (b) ZEB electrolyte.

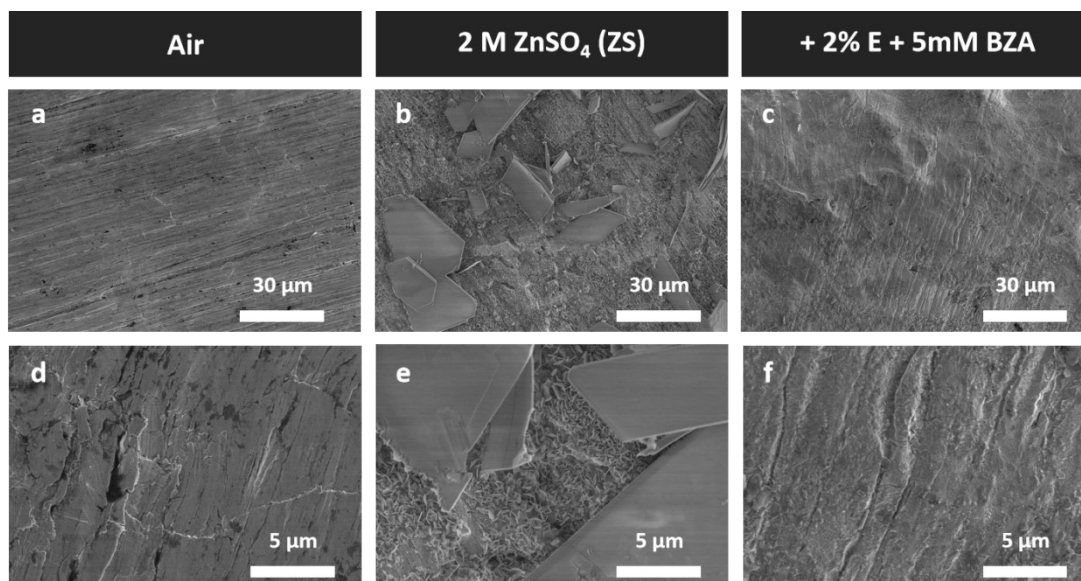

**Fig. S11** SEM images of the electrolyte immersion test: Zn foils immersed for 7 days in (a),(d) air; (b),(e) ZS electrolyte; (c),(f) ZEB electrolyte.

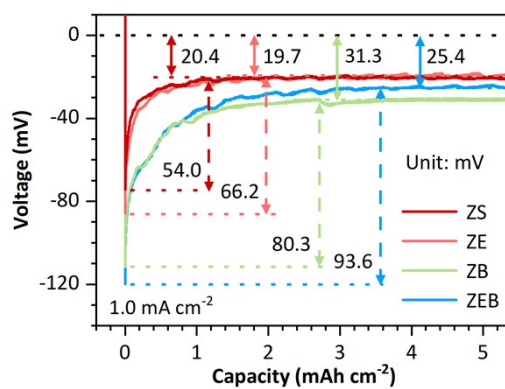

**Fig. S12** Voltage-capacity curve tests.

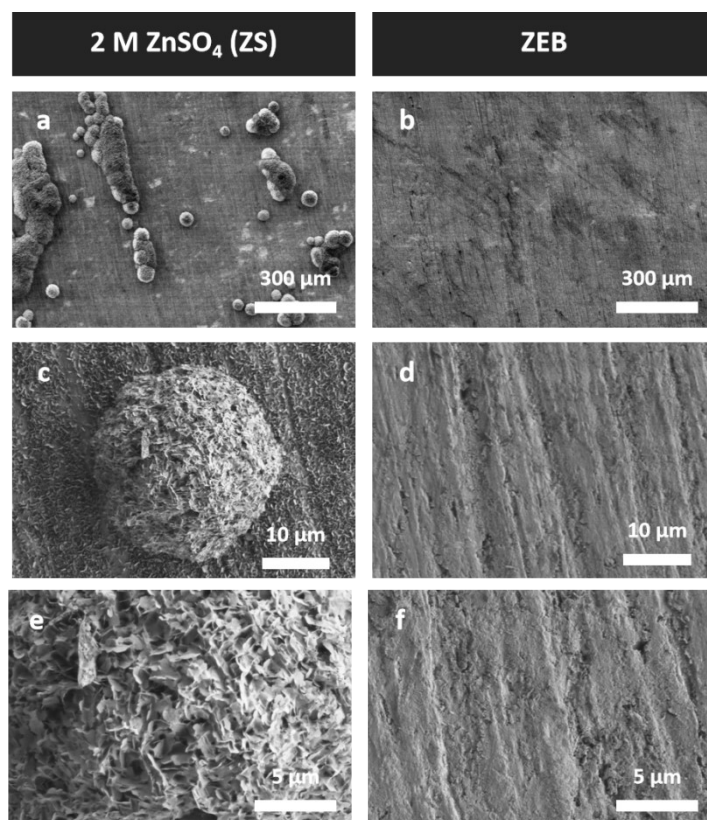

**Fig. S13** SEM images of Zn foil surfaces after deposition for 1 h at 10 mA cm<sup>-2</sup> in (a),(c),(e) ZS electrolyte and (b),(d),(f) ZEB electrolyte.

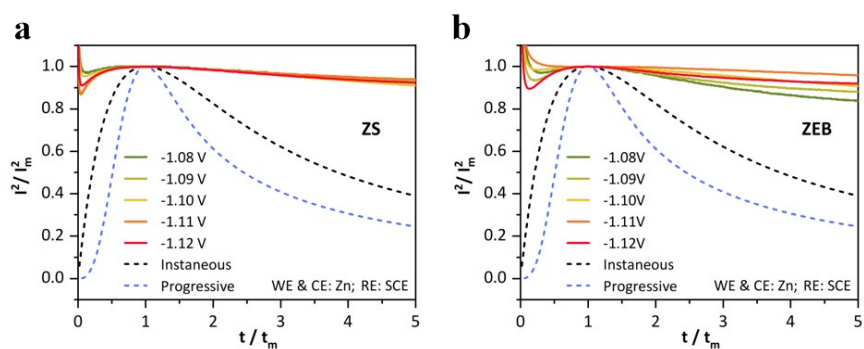

**Figure S14.** The dimensionless curves of zinc nucleation process in (a) ZS and (b) ZEB electrolytes.

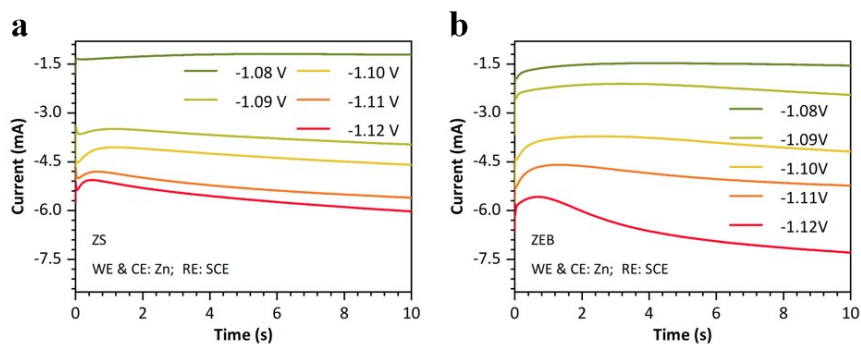

**Figure S15.** CA curves of zinc nucleation process at different voltages in (a) ZS and (b) ZEB electrolytes.

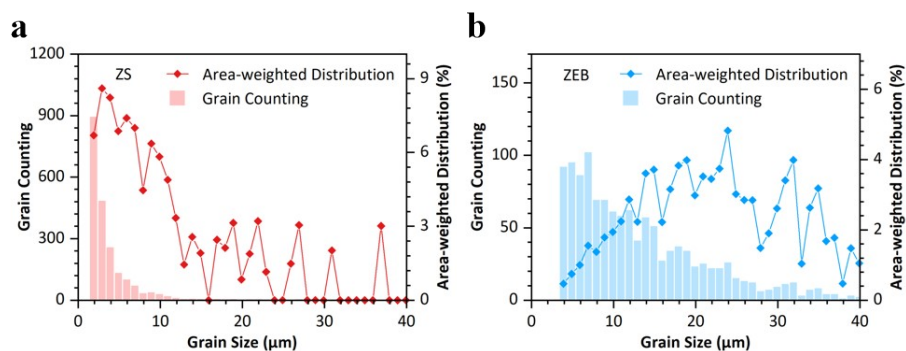

**Figure S16.** Statistical analysis of zinc grain size obtained from (a) ZS electrolyte and (b) ZEB electrolyte. Grain size is using the equivalent circle diameter method.

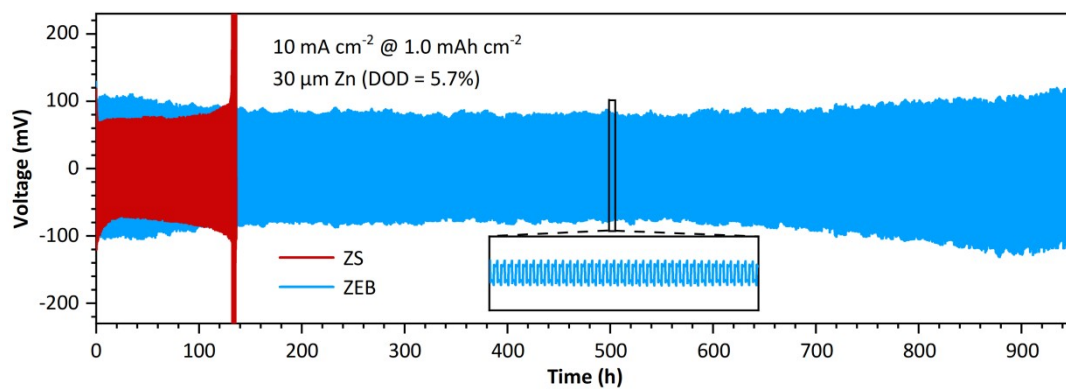

**Fig. S17** Cycling performance of Zn | Zn symmetric cells at  $10 \text{ mA cm}^{-2}$ ,  $1.0 \text{ mAh cm}^{-2}$ .

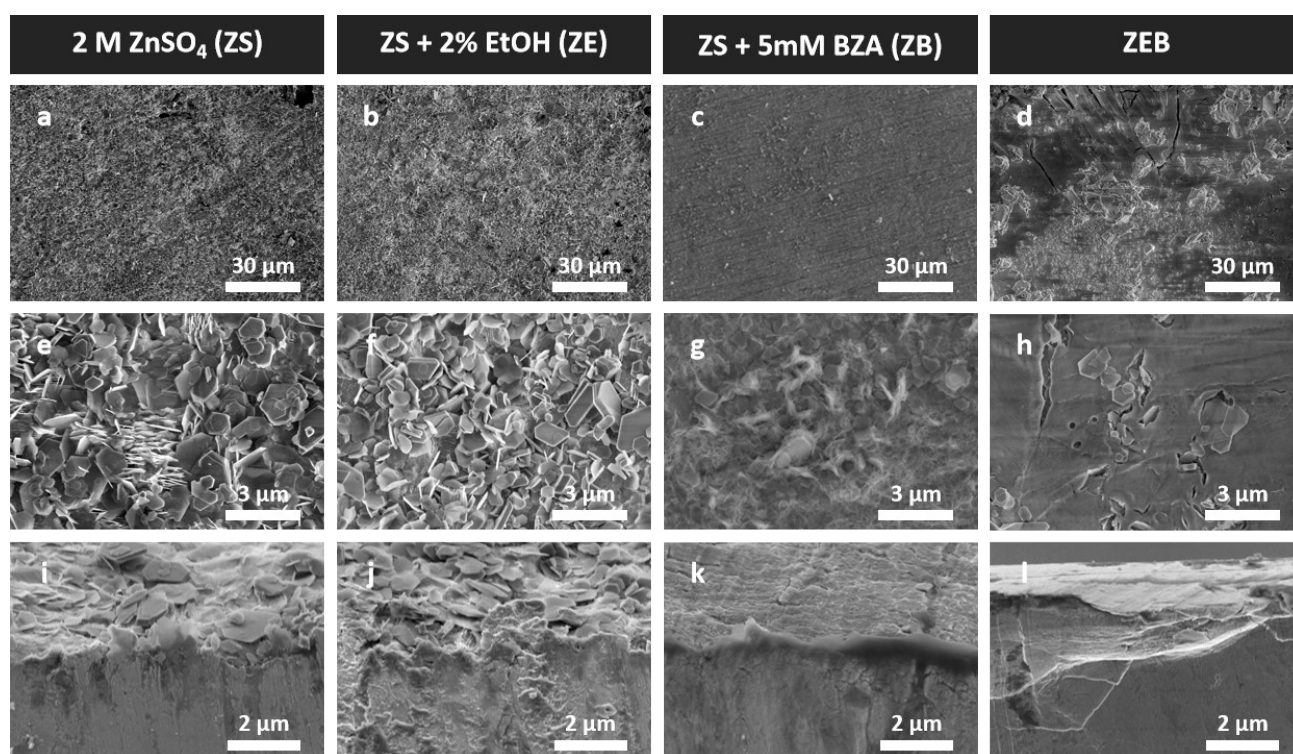

**Fig. S18** SEM images of Zn surfaces after 120 h of cycling at  $1.0 \text{ mA cm}^{-2}$ ,  $1.0 \text{ mAh cm}^{-2}$ .

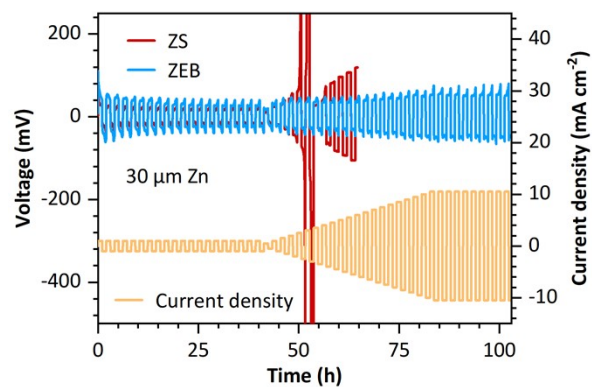

**Fig. S19** Critical current density (CCD) test for Zn | Zn (30  $\mu\text{m}$ ) symmetrical batteries.

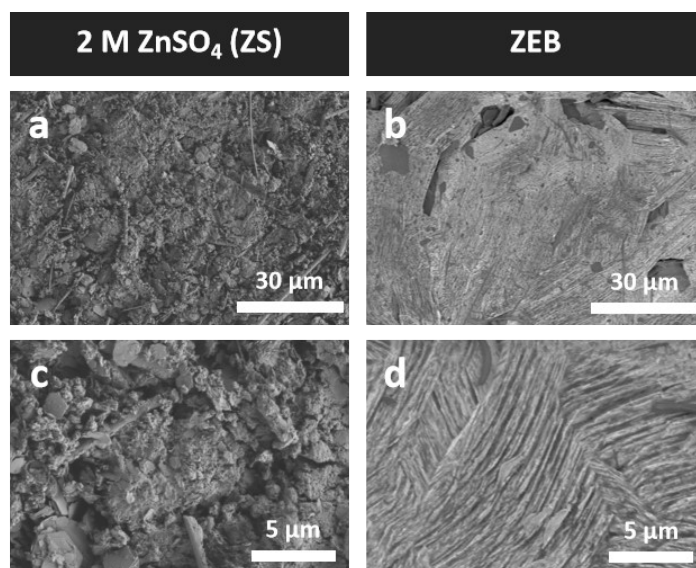

**Fig. S20** Scanning electron microscopy (SEM) image of the Zn anode surface after cycling for 120 hours at 10 mA  $\text{cm}^{-2}$  in the ZEB electrolyte.

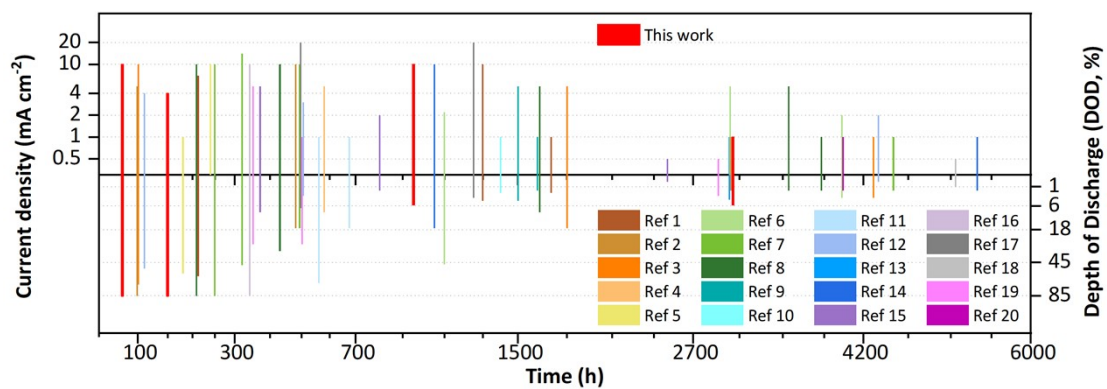

Fig. S21 Comparison of cycle life at different current densities and DOD with recent literature.

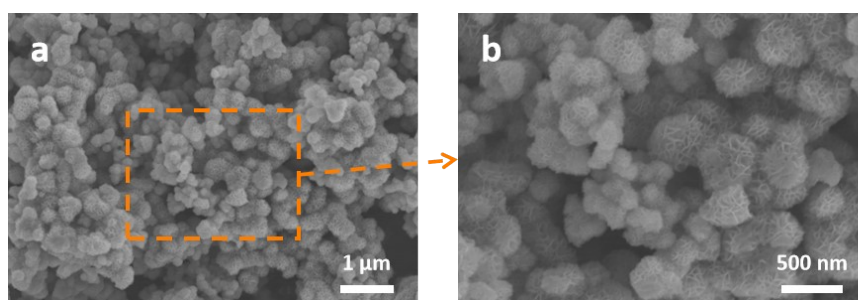

Fig. S22 SEM image of  $\delta$ -MnO<sub>2</sub>.

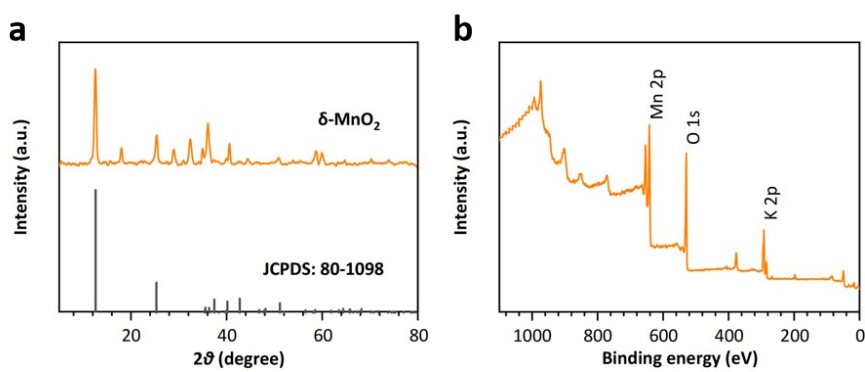

Fig. S23 (a) XRD pattern; (b) XPS spectrum of  $\delta\text{-MnO}_2$ .

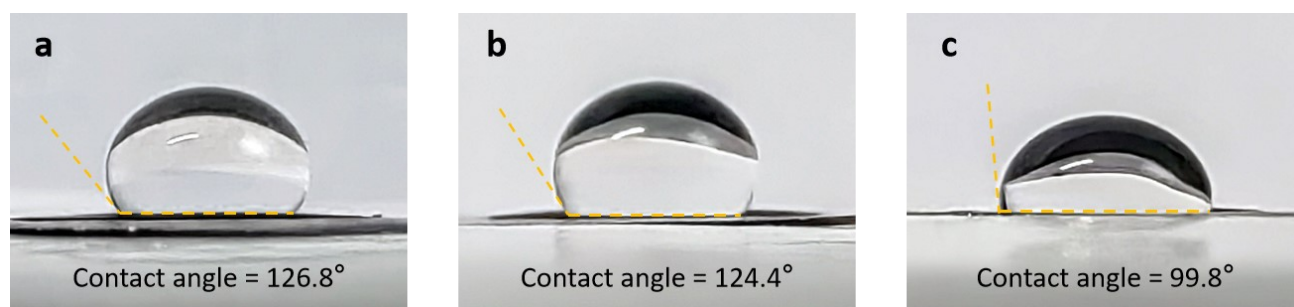

Fig. S24 Contact angles between the  $\delta\text{-MnO}_2$  cathode sheet and different electrolytes: (a) ZS; (b) ZE; (c) ZEB, the volume of electrolyte is  $40\ \mu\text{L}$ .

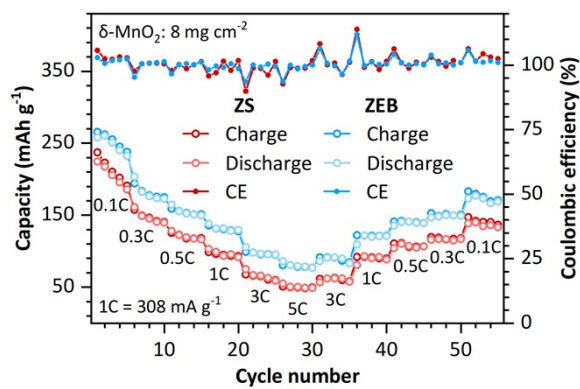

**Fig. S25** The rate performance for Zn ||  $\delta\text{-MnO}_2$  full cells with a high cathode mass loading of  $8 \text{ mg cm}^{-2}$ .

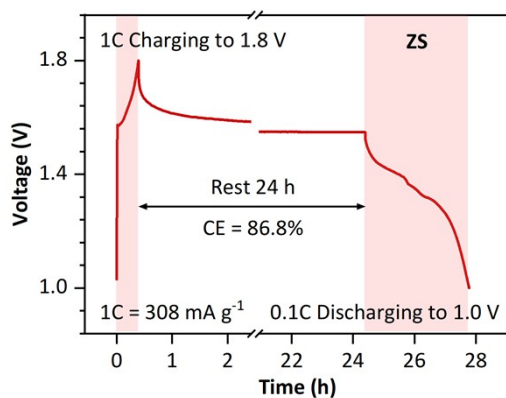

**Fig. S26** Self-discharge results for Zn ||  $\delta\text{-MnO}_2$  ( $8 \text{ mg cm}^{-2}$ ) full cells using ZS electrolyte.

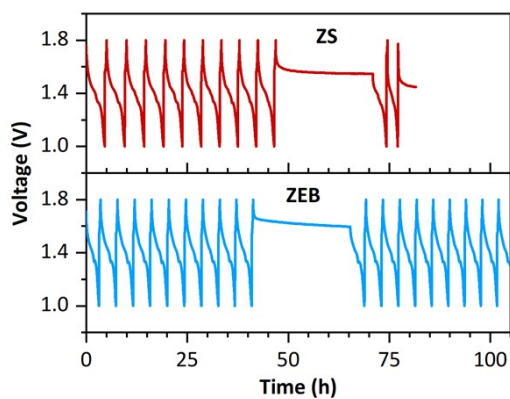

**Fig. S27** Voltage-time data for Zn ||  $\delta$ -MnO<sub>2</sub> (8 mg cm<sup>-2</sup>) full cells used for self-discharge testing (1C charging to 1.8 V and 0.1C discharging to 1.0 V).

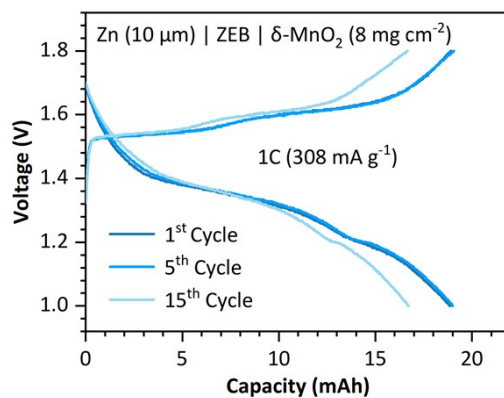

**Fig. S28** Voltage-capacity profiles of a 4×4 cm<sup>2</sup> pouch cell at 1C.

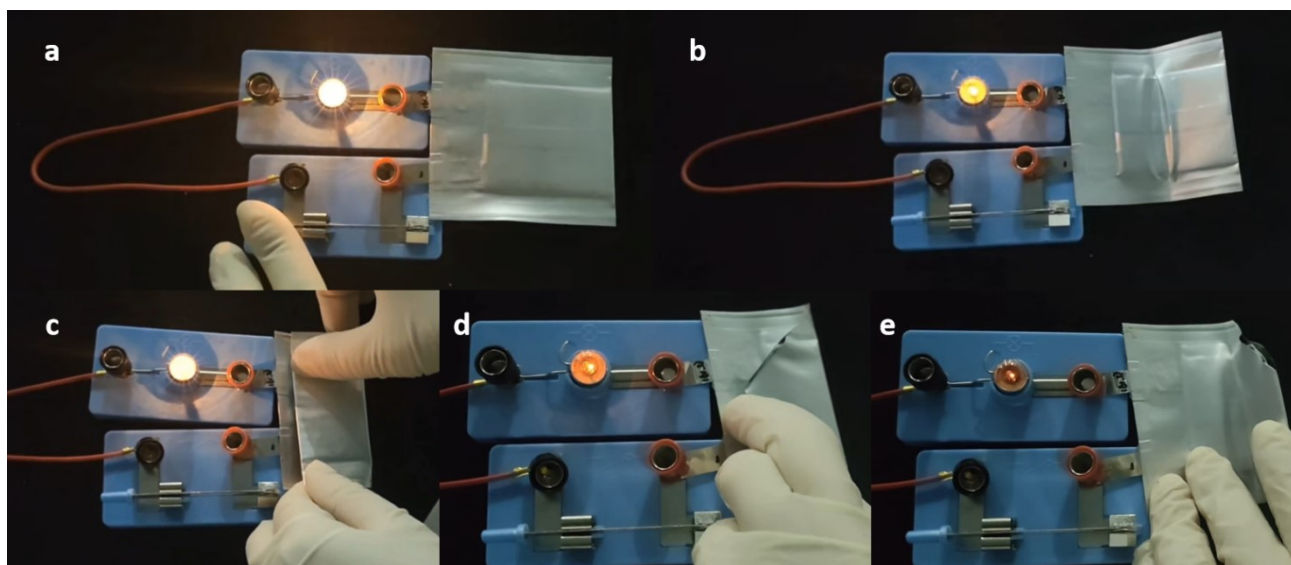

**Fig. S29** Schematic diagram of the single-layer pouch cell powering a 1.5 V 0.3 A bulb and undergoing destructive tests. (a) Normal condition; (b) Partial bending; (c) Complete bending; (d) Bending + cutting; (e) Reverse bending after cutting.

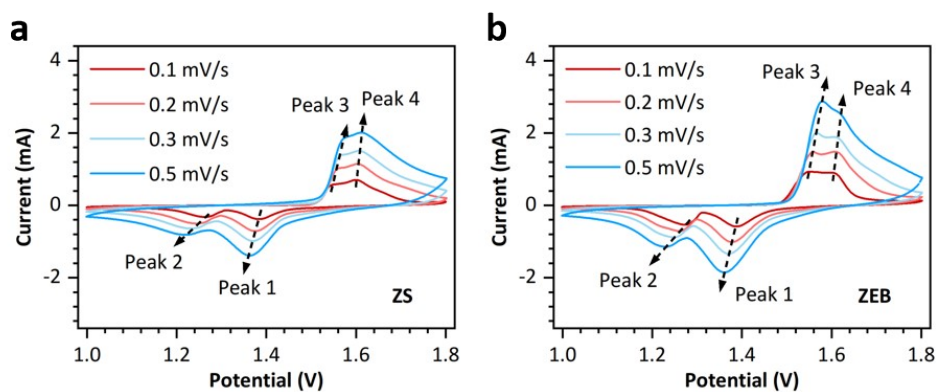

Fig. S30 CV curves at different scan rates for Zn |  $\delta$ -MnO<sub>2</sub> full cells using (a) ZS; (b) ZEB.

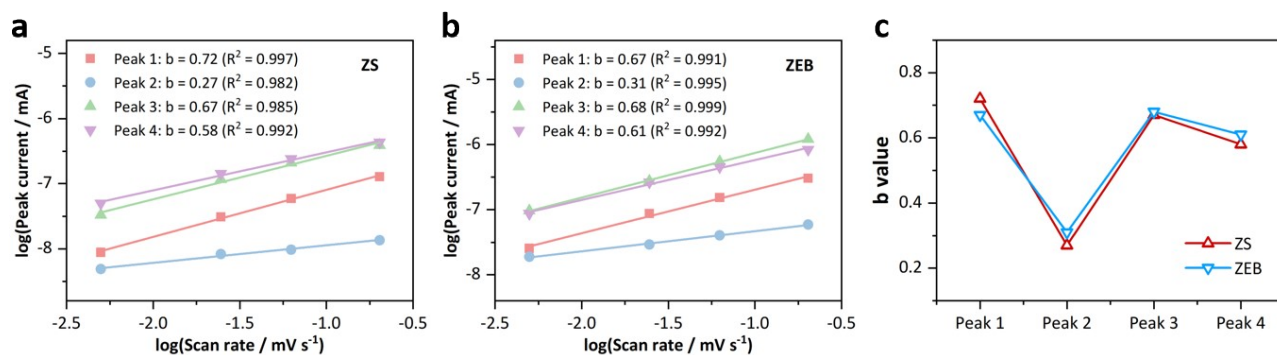

Fig. S31 Logarithmic fitting results of peak current versus scan rate for different peaks in CV curves of Zn |  $\delta$ -MnO<sub>2</sub> full cells using (a) ZS; (b) ZEB.

## Supplementary Tables

**Table S1.** Unit price of various chemicals in the China market

| Reference               | Additive                                         | Price<br>(RMB ton <sup>-1</sup> ) | Quotation Time | Concentration       | Extra Cost*<br>(RMB L <sup>-1</sup> ) |
|-------------------------|--------------------------------------------------|-----------------------------------|----------------|---------------------|---------------------------------------|
| This work               | EtOH                                             | 3500 <sup>a</sup>                 | 2026-02-28     | 0.3 M               | 0.0674                                |
|                         | BZA                                              | 26000 <sup>b</sup>                | 2026-02-26     | 5 mM                |                                       |
| Ref. 1 <sup>[16]</sup>  | 18-crown-6                                       | 99000 <sup>c</sup>                | 2026-03-28     | 0.5 M               | 13.1                                  |
| Ref. 2 <sup>[17]</sup>  | 4-dimethylamino-<br>Pyridine (DMAP)              | 130000 <sup>d</sup>               | 2026-03-10     | 0.1 M               | 1.59                                  |
| Ref. 3 <sup>[18]</sup>  | Piperidine-2-carboxylic<br>acid (PPCA)           | 460000 <sup>e</sup>               | 2026-01        | 0.1 M               | 5.94                                  |
| Ref. 4 <sup>[19]</sup>  | Sulfobutyl groups-grafted<br>β-cyclodextrin (SC) | 780000 <sup>f</sup>               | 2026-01-10     | 10 mM               | 13.3                                  |
| Ref. 5 <sup>[20]</sup>  | Cellobiose (CBS)                                 | 80000 <sup>g</sup>                | 2026-01-05     | 50 mM               | 1.37                                  |
| Ref. 6 <sup>[21]</sup>  | Citric acid (CA)                                 | 5200 <sup>c</sup>                 | 2026-03-28     | 20 mM               | 0.667                                 |
|                         | aspartame (APM)                                  | 110000 <sup>h</sup>               | 2026-01-10     | 20 mM               |                                       |
| Ref. 7 <sup>[22]</sup>  | N, N'-methylene-<br>bisacrylamide (MBA)          | 42000 <sup>i</sup>                | 2026-03-15     | 30 mM               | 0.194                                 |
| Ref. 8 <sup>[23]</sup>  | Polyquaternium-6 (P-6)                           | 30000 <sup>j</sup>                | 2026-02-10     | 8 g L <sup>-1</sup> | 0.240                                 |
| Ref. 9 <sup>[24]</sup>  | Xylo-oligosaccharide (Xos)                       | 50000 <sup>k</sup>                | 2026-01-20     | 0.2 M               | 1.52                                  |
| Ref. 10 <sup>[25]</sup> | EtOH                                             | 3500 <sup>a</sup>                 | 2026-02-28     | 20vol%              | 4.34                                  |
| Ref. 11 <sup>[26]</sup> | n-Propanol (NPA)                                 | 6000 <sup>l</sup>                 | 2025-11-06     | 90vol%              | 0.552                                 |

<sup>a</sup>Nantong Zhonghe Chemical New Material Co., Ltd.; <sup>b</sup>Wuhan Youji Xinrong Chemical Co., Ltd.; <sup>c</sup>Shandong Zhengxing New Material Co., Ltd.; <sup>d</sup>Shandong Mantanghong New Material Co., Ltd.; <sup>e</sup>Wuhan Pushida Biotechnology Co., Ltd.; <sup>f</sup>Shandong Yonghao Biotechnology Co., Ltd.; <sup>g</sup>Shandong Aicai Biotechnology Co., Ltd.; <sup>h</sup>Vitasweet Co., Ltd.; <sup>i</sup>Shandong Xingsheng New Material Co., Ltd.; <sup>j</sup>Shandong Taihe Water Treatment Co., Ltd.; <sup>k</sup>Shandong Longlive Bio-Technology Co., Ltd.; <sup>l</sup>Nantong Runfeng Petrochemical Co., Ltd.;  
 \*Extra Cost (RMB L<sup>-1</sup>) = 10<sup>-6</sup> (ton g<sup>-1</sup>) Price (RMB ton<sup>-1</sup>) × Concentration (mol L<sup>-1</sup>) × M (g mol<sup>-1</sup>); The volume fraction (δ<sub>v</sub>) is converted using the material density: 10<sup>3</sup> (cm<sup>3</sup> L<sup>-1</sup>) × δ<sub>v</sub> × ρ (g cm<sup>-3</sup>);

**Table S2.** Error analysis of desolvation energy calculation

| T (K)  | $\sigma_T$ (K) | $R_{ct}$ ( $\Omega$ ) | $\sigma_{Rct}$ ( $\Omega$ ) | $E_a$ ( $\text{kJ mol}^{-1}$ ) | $\sigma_{Ea}$ ( $\text{kJ mol}^{-1}$ ) |
|--------|----------------|-----------------------|-----------------------------|--------------------------------|----------------------------------------|
| 298.15 | $\pm 0.2$      | 1419                  | 30.9                        |                                |                                        |
| 303.15 | $\pm 0.2$      | 946.1                 | 35.5                        |                                |                                        |
| 308.15 | $\pm 0.2$      | 696.3                 | 16.6                        | 53.65                          | 0.87                                   |
| 313.15 | $\pm 0.2$      | 503.4                 | 13.6                        | (ZS)                           | (ZS)                                   |
| 318.15 | $\pm 0.2$      | 353.4                 | 10.8                        |                                |                                        |
| 323.15 | $\pm 0.2$      | 271.9                 | 12.6                        |                                |                                        |
| 298.15 | $\pm 0.2$      | 2142                  | 23.886                      |                                |                                        |
| 303.15 | $\pm 0.2$      | 1502                  | 34.969                      |                                |                                        |
| 308.15 | $\pm 0.2$      | 1145                  | 27.34                       | 48.04                          | 0.69                                   |
| 313.15 | $\pm 0.2$      | 863.1                 | 21.184                      | (ZEB)                          | (ZEB)                                  |
| 318.15 | $\pm 0.2$      | 637.8                 | 16.643                      |                                |                                        |
| 323.15 | $\pm 0.2$      | 466.7                 | 13.3                        |                                |                                        |

**Table S3.** The actual CPVC, CPVC<sub>max</sub> and their ratios of Zn symmetrical batteries

| Electrolyte                               | ZS   | ZE   | ZEB  |
|-------------------------------------------|------|------|------|
| CD / $\text{mA cm}^{-2}$                  | 1.0  | 1.0  | 1.0  |
| $d_{Zn}$ / $\mu\text{m}$                  | 30   | 30   | 30   |
| t / h                                     | 405  | 795  | 3000 |
| CPVC / $\text{Ah cm}^{-3}$                | 135  | 265  | 1000 |
| DOD / %                                   | 5.7  | 5.7  | 5.7  |
| ACE / %                                   | 98.2 | 99.0 | 99.2 |
| CPVC <sub>max</sub> / $\text{Ah cm}^{-3}$ | 613  | 1104 | 1380 |
| CPVC:CPVC <sub>max</sub> / %              | 22.0 | 24.0 | 72.5 |

\*CD is current density;  $d_{Zn}$  is thickness of Zn foil; t is test time; CPVC is cumulative electroplating volumetric capacity; DOD is depth of discharge; ACE is average Coulombic efficiency;

**Table S4.** An overview of relevant literature in 2025

| Reference               | Additive                                         | d <sub>Zn</sub> | CD                  | AC                   | t    | DOD   | CN    | CPVC                |
|-------------------------|--------------------------------------------------|-----------------|---------------------|----------------------|------|-------|-------|---------------------|
|                         |                                                  | µm              | mA cm <sup>-2</sup> | mAh cm <sup>-2</sup> | h    | %     | times | Ah cm <sup>-3</sup> |
| This work               | BZA + EtOH<br>(H-C strategy)                     | 30              | 1.0                 | 1.0                  | 3000 | 5.70  | 1500  | 1000                |
|                         |                                                  | 30              | 10.0                | 1.0                  | 950  | 5.70  | 4750  | 3167                |
|                         |                                                  | 10              | 4.0                 | 5.0                  | 150  | 85.43 | 60    | 600                 |
|                         |                                                  | 30              | 10.0                | 15.0                 | 78   | 85.43 | 26    | 260                 |
| Ref. 1 <sup>[16]</sup>  | 18-crown-6                                       | 80              | 1.0                 | 1.0                  | 1700 | 2.14  | 850   | 213                 |
|                         |                                                  | 80              | 0.1                 | 1.0                  | 953  | 2.14  | 48    | 12                  |
|                         |                                                  | 80              | 10.0                | 2.0                  | 1300 | 4.27  | 3250  | 1625                |
|                         |                                                  | 20              | 7.0                 | 7.0                  | 210  | 59.80 | 105   | 735                 |
| Ref. 2 <sup>[17]</sup>  | 4-dimethylamino-<br>pyridine                     | 100             | 1.0                 | 1.0                  | 3000 | 1.71  | 1500  | 300                 |
|                         |                                                  | 100             | 10.0                | 10.0                 | 480  | 17.09 | 240   | 480                 |
|                         |                                                  | 10              | 5.0                 | 5.0                  | 100  | 85.43 | 50    | 500                 |
| Ref. 3 <sup>[18]</sup>  | Piperidine-2-carboxylic<br>acid (PPCA)           | 50              | 5.0                 | 5.0                  | 1800 | 17.09 | 900   | 1800                |
|                         |                                                  | 50              | 1.0                 | 1.0                  | 4300 | 3.42  | 2150  | 860                 |
|                         |                                                  | 50              | 10.0                | 20.6                 | 100  | 70.39 | 24    | 200                 |
| Ref. 4 <sup>[19]</sup>  | Sulfobutyl groups-grafted<br>β-cyclodextrin (SC) | 20              | 10.0                | 10.0                 | 250  | 85.43 | 125   | 1250                |
|                         |                                                  | 50              | 5.0                 | 2.5                  | 580  | 8.54  | 580   | 580                 |
|                         |                                                  | 50              | 1.0                 | 1.0                  | 1300 | 3.42  | 650   | 260                 |
|                         |                                                  | 50              | 10                  | 1.0                  | 480  | 3.42  | 2400  | 960                 |
| Ref. 5 <sup>[27]</sup>  | Hydrolytic polymaleic<br>anhydride (HPMA)        | n/a             | 0.5                 | 0.5                  | 3500 | n/a   | 1750  | n/a                 |
|                         |                                                  | n/a             | 5.0                 | 1.0                  | 3000 | n/a   | 7500  | n/a                 |
|                         |                                                  | 30              | 1.0                 | 10.0                 | 180  | 56.95 | 9     | 60                  |
| Ref. 6 <sup>[20]</sup>  | Cellobiose (CBS)                                 | n/a             | 10.0                | 1.0                  | 240  | n/a   | 1200  | n/a                 |
|                         |                                                  | 20              | 2.2                 | 5.5                  | 1100 | 46.98 | 220   | 1210                |
|                         |                                                  | 50              | 2.0                 | 1.0                  | 4000 | 3.42  | 4000  | 1600                |
| Ref. 7 <sup>[21]</sup>  | Citric acid (CA) +<br>aspartame (APM)            | 100             | 1.0                 | 1.0                  | 4500 | 1.71  | 2250  | 450                 |
|                         |                                                  | 100             | 10.0                | 10.0                 | 500  | 17.09 | 250   | 500                 |
|                         |                                                  | 50              | 14.0                | 14.0                 | 320  | 47.84 | 160   | 896                 |
| Ref. 8 <sup>[28]</sup>  | Tyrosine (Tyr)                                   | 50              | 10.0                | 25.0                 | 250  | 85.43 | 50    | 500                 |
|                         |                                                  | 100             | 1.0                 | 1.0                  | 3800 | 1.71  | 1900  | 380                 |
|                         |                                                  | 100             | 5.0                 | 1.0                  | 3500 | 1.71  | 8750  | 1750                |
|                         |                                                  | 20              | 10.0                | 10.0                 | 210  | 85.43 | 105   | 1050                |
|                         |                                                  | 50              | 10.0                | 10.0                 | 430  | 34.17 | 215   | 860                 |
| Ref. 9 <sup>[22]</sup>  | N, N'-methylene-<br>bisacrylamide (MBA)          | 100             | 5.0                 | 5.0                  | 1630 | 8.54  | 815   | 815                 |
|                         |                                                  | 100             | 1.0                 | 1.0                  | 1600 | 1.71  | 800   | 160                 |
| Ref. 10 <sup>[23]</sup> | Polyquaternium-6                                 | 100             | 5.0                 | 2.5                  | 1500 | 4.27  | 1500  | 750                 |
|                         |                                                  | 80              | 1.0                 | 1.0                  | 1400 | 2.14  | 700   | 175                 |
| Ref. 11 <sup>[24]</sup> | Xylo-oligosaccharide (Xos)                       | 100             | 1.0                 | 10.0                 | 675  | 17.09 | 34    | 68                  |
|                         |                                                  | 100             | 1.0                 | 40.0                 | 560  | 68.34 | 7     | 56                  |
| Ref. 12 <sup>[29]</sup> | Al <sub>2</sub> (SO <sub>4</sub> ) <sub>3</sub>  | 100             | 2.0                 | 0.3                  | 4350 | 0.43  | 17400 | 870                 |
|                         |                                                  | 70              | 3.0                 | 1.2                  | 500  | 2.93  | 625   | 214                 |
|                         |                                                  | 20              | 4.0                 | 6.0                  | 110  | 51.26 | 37    | 220                 |

| Reference               | Additive                                                             | $d_{Zn}$      | CD                  | AC                   | t    | DOD   | CN    | CPVC                |
|-------------------------|----------------------------------------------------------------------|---------------|---------------------|----------------------|------|-------|-------|---------------------|
|                         |                                                                      | $\mu\text{m}$ | $\text{mA cm}^{-2}$ | $\text{mAh cm}^{-2}$ | h    | %     | times | $\text{Ah cm}^{-3}$ |
| Ref. 13 <sup>[28]</sup> | [BnNEt <sub>3</sub> ] <sup>+</sup> Cl <sup>-</sup>                   | 42.7          | 1.0                 | 1.0                  | 3000 | 4.00  | 1500  | 702                 |
| Ref. 14 <sup>[29]</sup> | Itaconic acid (IA)                                                   | 100           | 1.0                 | 1.0                  | 5390 | 1.71  | 2695  | 539                 |
|                         |                                                                      | 100           | 10.0                | 10.0                 | 1050 | 17.09 | 525   | 1050                |
| Ref. 15 <sup>[30]</sup> | (NH <sub>4</sub> ) <sub>3</sub> [PMo <sub>12</sub> O <sub>40</sub> ] | 100           | 0.5                 | 0.3                  | 2500 | 0.43  | 2500  | 125                 |
|                         |                                                                      | 100           | 2.0                 | 1.0                  | 800  | 1.71  | 800   | 160                 |
|                         |                                                                      | 100           | 5.0                 | 5.0                  | 370  | 8.54  | 185   | 185                 |
| Ref. 16 <sup>[31]</sup> | D-glucuronamide (D-Glu)                                              | 20            | 10.0                | 10.0                 | 340  | 85.43 | 170   | 1700                |
|                         |                                                                      | n/a           | 5.0                 | 1.0                  | 3400 | n/a   | 8500  | n/a                 |
| Ref. 17 <sup>[32]</sup> | Trifluoroacetamide (CNF)                                             | n/a           | 10.0                | 5.0                  | 1890 | n/a   | 1890  | n/a                 |
|                         |                                                                      | 100           | 20.0                | 2.0                  | 1250 | 3.42  | 6250  | 2500                |
| Ref. 18 <sup>[33]</sup> | 1-(2-hydroxyethyl)-1-methylguanidine dihydrogen phosphate (HMDP)     | 100           | 20.0                | 4.0                  | 500  | 6.83  | 1250  | 1000                |
|                         |                                                                      | 80            | 0.5                 | 0.5                  | 5150 | 1.07  | 2575  | 322                 |
| Ref. 19 <sup>[34]</sup> | Chitosan (CTS) + InCl <sub>3</sub> (hybrid additive strategy)        | 30            | 0.5                 | 0.5                  | 2900 | 2.85  | 1450  | 483                 |
|                         |                                                                      | 30            | 1.0                 | 5.0                  | 500  | 28.48 | 50    | 167                 |
|                         |                                                                      | 30            | 5.0                 | 5.0                  | 350  | 28.48 | 175   | 583                 |
| Ref. 20 <sup>[35]</sup> | Pyrocatechol violet (PV)                                             | 100           | 1.0                 | 1.0                  | 4000 | 1.71  | 2000  | 400                 |
|                         |                                                                      | 100           | 5.0                 | 1.0                  | 1300 | 1.71  | 3250  | 650                 |

\* $d_{Zn}$  is thickness of Zn foil; CD is current density; AC is areic capacity; t is test time; DOD is depth of discharge; CN is cycle number; CPVC is cumulative electroplating volumetric capacity;

## References

- [1] T. D. Kühne, M. Iannuzzi, M. D. Ben, V. V. Rybkin, P. Seewald, F. Stein, T. Laino, R. Z. Khaliullin, O. Schütt, F. Schiffrmann, D. Golze, J. Wilhelm, S. Chulkov, M. H. Bani-Hashemian, V. Weber, U. Borštnik, M. TAILLEFUMIER, A. S. Jakobovits, A. Lazzaro, H. Pabst, T. Müller, R. Schade, M. Guidon, S. Andermatt, N. Holmberg, G. K. Schenter, A. Hehn, A. Bussy, F. Belleflamme, G. Tabacchi, A. Glöß, M. Lass, I. Bethune, C. J. Mundy, C. Plessl, M. Watkins, J. VandeVondele, M. Krack and J. Hutter, *J. Chem. Phys.*, 2020, **152**, 194103.
- [2] J. VandeVondele, M. Krack, F. Mohamed, M. Parrinello, T. Chassaing and J. Hutter, *Comput. Phys. Commun.*, 2005, **167**, 103–128.
- [3] P. J. Perdew, K. Burke and M. Ernzerhof, *Phys. Rev. Lett.*, 1996, **77**, 3865–3868.
- [4] S. Goedecker, M. Teter and J. Hutter, *Phys. Rev. B*, 1996, **54**, 1703–1710.
- [5] S. Grimme, J. Antony, S. Ehrlich and H. Krieg, *J. Chem. Phys.*, 2010, **132**, 154104.
- [6] S. Grimme, S. Ehrlich and L. Goerigk. *J. Comput. Chem.*, 2011, **32**, 1456.
- [7] J. VandeVondele, J. Hutter. *J. Chem. Phys.* 127, 114105 (2007). Gaussian basis sets for accurate calculations on molecular systems in gas and condensed phases.
- [8] H.J. Monkhorst, J.D. Pack, Special points for Brillouin-zone integrations, *Phys. Rev. B* 13 (12) (1976) 5188.
- [9] Gaussian 16, Revision C.02, M. J. Frisch, G. W. Trucks, H. B. Schlegel, G. E. Scuseria, M. A. Robb, J. R. Cheeseman, G. Scalmani, V. Barone, G. A. Petersson, H. Nakatsuji, X. Li, M. Caricato, A. V. Marenich, J. Bloino, B. G. Janesko, R. Gomperts, B. Mennucci, H. P. Hratchian, J. V. Ortiz, A. F. Izmaylov, J. L. Sonnenberg, D. Williams-Young, F. Ding, F. Lipparini, F. Egidi, J. Goings, B. Peng, A. Petrone, T. Henderson, D. Ranasinghe, V. G. Zakrzewski, J. Gao, N. Rega, G. Zheng, W. Liang, M. Hada, M. Ehara, K. Toyota, R. Fukuda, J. Hasegawa, M. Ishida, T. Nakajima, Y. Honda, O. Kitao, H. Nakai, T. Vreven, K. Throssell, J. A. Montgomery, Jr., J. E. Peralta, F. Ogliaro, M. J. Bearpark, J. J. Heyd, E. N. Brothers, K. N. Kudin, V. N. Staroverov, T. A. Keith, R. Kobayashi, J. Normand, K. Raghavachari, A. P. Rendell, J. C. Burant, S. S. Iyengar, J. Tomasi, M. Cossi, J. M. Millam, M. Klene, C. Adamo, R. Cammi, J. W. Ochterski, R. L. Martin, K. Morokuma, O. Farkas, J. B. Foresman and D. J. Fox, Gaussian, Inc., Wallingford CT, 2019.
- [10] P. J. Stephens, F. J. Devlin, C. F. Chabalowski and M. J. Frisch, *J. Phys. Chem.*, 1994, **98**, 11623–11627.
- [11] W. Humphrey, A. Dalke and K. Schulten, *J. Molecular Graphics*, 1996, **14**, 33–38.
- [12] T. Lu and F. Chen, *J. Comput. Chem.*, 2012, **33**, 580–592.
- [13] T. Lu, *J. Chem. Phys.*, 2024, **161**, 082503.
- [14] J. Zhang and T. Lu, *Phys. Chem. Chem. Phys.*, 2021, **23**, 20323–20328.
- [15] H. J. C. Berendsen, D. van der Spoel and R. van Drunen, *Comput. Phys. Commun.*, 1995, **91**, 43–56.
- [16] A. Wu, S. Zhang, Q. Li, W. Xue, C. Li, B. Xi, W. Mao, K. Bao and S. Xiong, *Adv. Energy Mater.*, 2025, **15**, 2404450.
- [17] S. Han, Y. Zheng, X. Zhang, S. Alshammari, W. Fan, S. Yin, Z. M. El-Bahy, H. K. Thabet, S. Gong, B. Lu, Y. Liu and J. Zhou, *Adv. Mater.*, 2025, **37**, e11814.
- [18] Z. Zhen, Z. Liu, Y. Li, H. Huang, X. Peng, L. Chen, L. Xue, P. Xiong and J. Zhu, *Adv. Funct. Mater.*, 2025, **35**, 2509433.
- [19] Y. Li, X. Li, X. Peng, X. Yang, F. Kang and L. Dong, *Nano-Micro Lett.*, 2025, **17**, 268.
- [20] S. Zhang, S. Huang, W. Chen, Z. Hu, D. H. Min, J. S. Kim, H. Fu, Y. S. Yun, W.-C. Cho, B.-H. Kim, B. Li, C. Li, J. Sun and H. S. Park, *Adv. Funct. Mater.*, 2025, e23753.
- [21] T. Xue, Y. Mu, Z. Zhang, J. Guan, J. Qiu, C. Yang, L. Zang and L. Zeng, *Adv. Energy Mater.*, 2025, **15**, 2500674.
- [22] D. Chen, X. Ma, W. Xu, C. Yan, P. Lyu, Q. Zhu, H. Yu, Z. Gao and C. Lv, *Exploration*, 2025, **5**, 20240007.
- [23] X. Miao, J. Chen, X. Zheng, H. Li and L. Zhang, *Energy Storage Mater.*, 2025, **82**, 104620.
- [24] W. Guo, L. Xu, Y. Su, L. Zhao, Y. Ding, Y. Zou, G. Zheng, T. Cheng and J. Sun, *Angew. Chem. Int. Ed.*, 2025, **64**, e202417125.
- [25] Z. Tian, H. Liu, M. Cheng, L. Cui, R. Zhang, X. Yang, D. Wu, D. Wang and J. Xia, *ACS Appl. Mater. Interfaces*, 2024, **16**, 21857–21867.
- [26] Z. Liu, J. Sun, X. Li, N. Jiang, Y. Zhang, S. Lei, F. Guo, H. Mi, Q. Yang and J. Qiu, *Energy Storage Mater.*, 2025, **83**, 104727.
- [27] J. Li, Y. Long, X. Yu, J. Li, N. Li, J. Han, J. Wang and Z. Yang, *Energy Storage Mater.*, 2025, **76**, 104154.
- [28] L. Zhang, M. Lin, Z. Yu, Y. Huang, Q. Sun, X. Lu and H. Cheng, *Energy Storage Mater.*, 2025, **75**, 104022.
- [29] T. Ji, D. Feng, Z.-H. Huang, Y. Yao, H. Li, Z. Wu, W. Du, H. Pan and T. Ma, *Adv. Energy Mater.*, 2025, **15**, e03628.

- [30] Z. Mai, Y. Lin, J. Sun, C. Wang, G. Yang and C. Wang, *Nano-Micro Lett.*, 2025, **17**, 259.
- [31] H. Sun, N. Cai, X. Bai, H. Chen, X. He, D. Zhou and L.-Z. Fan, *Adv. Funct. Mater.*, 2025, **35**, 2424398.
- [32] Y. Liu, L. Miao, H. Shen, Z. Wang, K. Yao, Y. Hu, J. Sun, S. Hou, J. Zhao and K. Yang, *Adv. Funct. Mater.*, 2025, **35**, 2501968.
- [33] L. Zhang, S. Bi, X. Liu, Q. Sun, T. Hu, X. Lua and H. Cheng, *Energy Environ. Sci.*, 2025, **18**, 7555-7567.
- [34] S. Li, X. Chen, J. Zhao, Y. Zhang, K. Zhang, K. Wang, J. Shen, P. Lv, Y. Jia and Y. Bai, *ACS Energy Lett.*, 2025, **10**, 1642-1653.
- [35] H. Tong, J. Li, M. Chuai, Y. Sun, Z. Yang, Y. Su, X. Nie, S. Deng, M. Wu and G. Chai, *Energy Storage Mater.*, 2025, **82**, 104609.
- [36] J. Song, Z. Ren, Z. Chen, S. Zhang, Z. Yu, J. Cheng and B. Wang, *Energy Storage Mater.*, 2025, **81**, 104523.
- [37] W. Liang, D. Li, R. Zhong, S. Tao, Y. Zhu, W. Tan, R. Xu, Y. Yuan, I. Zhitomirsky and J. Lu, *Adv. Funct. Mater.*, 2025, **35**, 2504195.
